# Supplementary material for: Fusion protein pan-sarbecovirus vaccines elicit broadly protective immune responses targeting Clade 1a, 1b, and 3 sarbecoviruses
Source: Research Square preprint supplement (doi:10.21203/rs.3.rs-8544714/v1), 2026-01-28
Supplement: Supplementary file 1 [file 4f38156f4a21e038c6e9ec2e.docx]

**Data accession for reviewers - NCOMMS-26-001693**

**Mass Spec on MassIVE**

Massive - [ftp://MSV000100569@massive-ftp.ucsd.edu](https://urldefense.com/v3/__ftp:/MSV000100569@massive-ftp.ucsd.edu/__;!!NLFGqXoFfo8MMQ!up2DZ3WderqqxcP3v6glzlFwMi0Eh2m-48Lv1IlmYDeF3INvfw-0nxtuUIIAjUfV9jX5wJSVCs_baiyPwz6_iQlRIcsf_Tg$)

Accession Number - MSV000100569

Reviewer PW: PanSarbeco#2026!

**Sequencing - GenBank Accession Numbers**

BankIt3044744 Construct_4500    PX898054
BankIt3044744 Construct_4501    PX898055
BankIt3044744 Construct_4502    PX898056
BankIt3044744 Construct_4503    PX898057
